# Supplementary material for: Predictors of mortality among hospitalized COVID-19 patients and risk score formulation for prioritizing tertiary care—An experience from South India
Source: PubMed Central journal article supplement (PMC8812932; doi:10.1371/journal.pone.0263471), 2022-02-03
Supplement: pone.0263471.s003.pdf [file pone.0263471.s003.pdf]

|                        |     |                                                                                                                                                                                                                                                                                                                                                                                                                                                                                                                                                                   | limitations                                                                                                                                                                                                                                |
|------------------------|-----|-------------------------------------------------------------------------------------------------------------------------------------------------------------------------------------------------------------------------------------------------------------------------------------------------------------------------------------------------------------------------------------------------------------------------------------------------------------------------------------------------------------------------------------------------------------------|--------------------------------------------------------------------------------------------------------------------------------------------------------------------------------------------------------------------------------------------|
| Study size             | 10  | Explain how the study size was arrived at                                                                                                                                                                                                                                                                                                                                                                                                                                                                                                                         | Not applicable as the study was only a retrospective analysis                                                                                                                                                                              |
| Quantitative variables | 11  | Explain how quantitative variables were handled in the analyses. If applicable, describe which groupings were chosen and why                                                                                                                                                                                                                                                                                                                                                                                                                                      | Methods – Categorisation of Outcomes and variables considered subsections                                                                                                                                                                  |
| Statistical methods    | 12  | (a) Describe all statistical methods, including those used to control for confounding<br>(b) Describe any methods used to examine subgroups and interactions<br>(c) Explain how missing data were addressed<br>(d) <i>Cohort study</i> —If applicable, explain how loss to follow-up was addressed<br><i>Case-control study</i> —If applicable, explain how matching of cases and controls was addressed<br><i>Cross-sectional study</i> —If applicable, describe analytical methods taking account of sampling strategy<br>(e) Describe any sensitivity analyses | Methods – Statistical analyses And risk score construction<br>Methods – Statistical analyses And risk score construction Addressed as a limitation<br>Methods – Statistical analyses And risk score construction<br>Section not applicable |
| <b>Results</b>         |     |                                                                                                                                                                                                                                                                                                                                                                                                                                                                                                                                                                   |                                                                                                                                                                                                                                            |
| Participants           | 13* | (a) Report numbers of individuals at each stage of study—eg numbers potentially eligible, examined for eligibility, confirmed eligible, included in the study, completing follow-up, and analysed<br>(b) Give reasons for non-participation at each stage<br>(c) Consider use of a flow diagram                                                                                                                                                                                                                                                                   | Results (paragraph 1) and Table 1<br>Section not applicable<br>Section not applicable                                                                                                                                                      |
| Descriptive data       | 14* | (a) Give characteristics of study participants (eg demographic, clinical, social) and information on exposures and potential confounders<br>(b) Indicate number of participants with missing data for each variable of interest<br>(c) <i>Cohort study</i> —Summarise follow-up time (eg, average and total amount)                                                                                                                                                                                                                                               | Table 1 and Supplementary Table 1<br>Section not applicable<br>Section not applicable                                                                                                                                                      |
| Outcome data           | 15* | <i>Cohort study</i> —Report numbers of outcome events or summary measures over time<br><i>Case-control study</i> —Report numbers in each exposure category, or summary measures of exposure<br><i>Cross-sectional study</i> —Report numbers of outcome events or summary measures                                                                                                                                                                                                                                                                                 | Section not applicable                                                                                                                                                                                                                     |
| Main results           | 16  | (a) Give unadjusted estimates and, if applicable, confounder-adjusted estimates and their precision (eg, 95% confidence interval). Make clear which confounders were adjusted for and why they were included<br>(b) Report category boundaries when continuous                                                                                                                                                                                                                                                                                                    | Table 1 and Results section (paragraphs 1-6)<br>Results section (paragraphs 1-6)                                                                                                                                                           |

|                          |    |                                                                                                                                                                            |                                                                                                                                       |
|--------------------------|----|----------------------------------------------------------------------------------------------------------------------------------------------------------------------------|---------------------------------------------------------------------------------------------------------------------------------------|
|                          |    | variables were categorized<br>(c) If relevant, consider translating estimates of relative risk into absolute risk for a meaningful time period                             | Figure 1 and Table 2                                                                                                                  |
| Other analyses           | 17 | Report other analyses done—eg analyses of subgroups and interactions, and sensitivity analyses                                                                             | Results – Multivariable analysis & model creation and construction & calculation of risk score subsections, Figure 2 and Tables 2 & 3 |
| <b>Discussion</b>        |    |                                                                                                                                                                            |                                                                                                                                       |
| Key results              | 18 | Summarise key results with reference to study objectives                                                                                                                   | Discussion (paragraphs 1 - 11)                                                                                                        |
| Limitations              | 19 | Discuss limitations of the study, taking into account sources of potential bias or imprecision. Discuss both direction and magnitude of any potential bias                 | Discussion (paragraph 7)                                                                                                              |
| Interpretation           | 20 | Give a cautious overall interpretation of results considering objectives, limitations, multiplicity of analyses, results from similar studies, and other relevant evidence | Discussion (paragraph 12)                                                                                                             |
| Generalisability         | 21 | Discuss the generalisability (external validity) of the study results                                                                                                      | Discussion (paragraph 12)                                                                                                             |
| <b>Other information</b> |    |                                                                                                                                                                            |                                                                                                                                       |
| Funding                  | 22 | Give the source of funding and the role of the funders for the present study and, if applicable, for the original study on which the present article is based              | No funding available                                                                                                                  |

\*Give information separately for cases and controls in case-control studies and, if applicable, for exposed and unexposed groups in cohort and cross-sectional studies.

**Note:** An Explanation and Elaboration article discusses each checklist item and gives methodological background and published examples of transparent reporting. The STROBE checklist is best used in conjunction with this article (freely available on the Web sites of PLoS Medicine at <http://www.plosmedicine.org/>, Annals of Internal Medicine at <http://www.annals.org/>, and Epidemiology at <http://www.epidem.com/>). Information on the STROBE Initiative is available at [www.strobe-statement.org](http://www.strobe-statement.org).
